# Supplementary material for: Regulation of DNA (de)Methylation Positively Impacts Seed Germination during Seed Development under Heat Stress
Source: MDPI journal article supplement (doi:10.3390/genes12030457), 2021-03-23
Supplement: s1 [file s1]

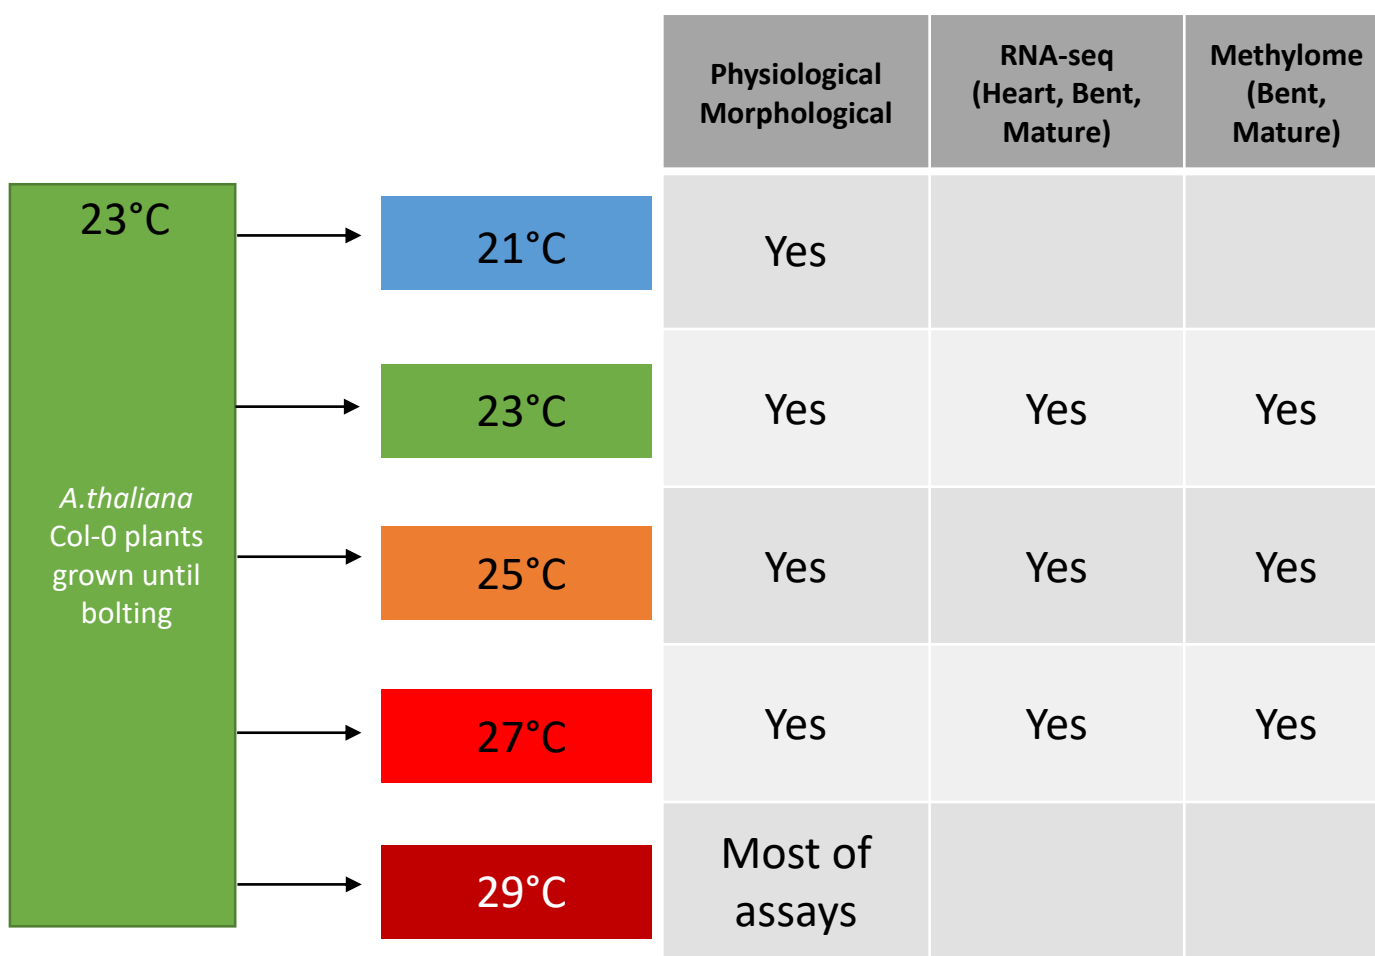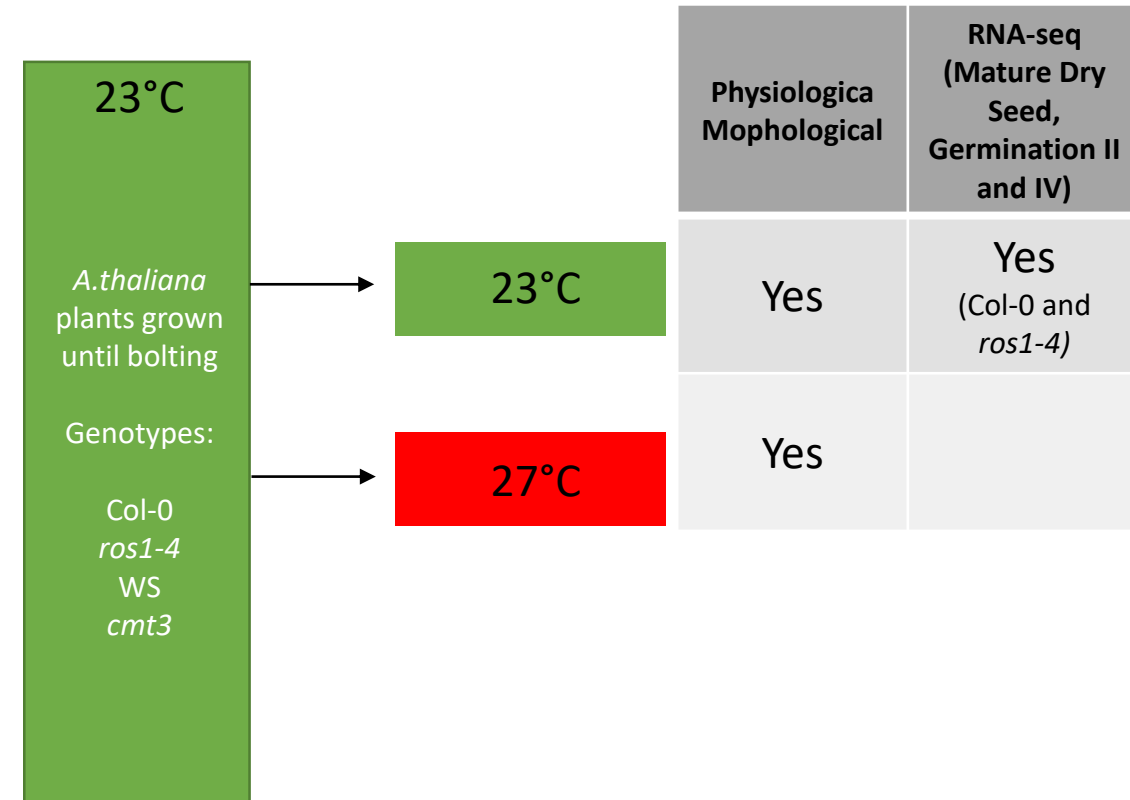

RNA-seq and Methylome  
Gene Expression Omnibus  
(GEO, GSE167245)  
Malabarba et al., 2021 (this study)

Data Mining RNA-seq  
Gene Expression Omnibus  
(GEO, GSE94459)  
Narsai et al., 2017
