# Supplementary material for: Regulation of DNA (de)Methylation Positively Impacts Seed Germination during Seed Development under Heat Stress
Source: MDPI journal article supplement (doi:10.3390/genes12030457), 2021-03-23

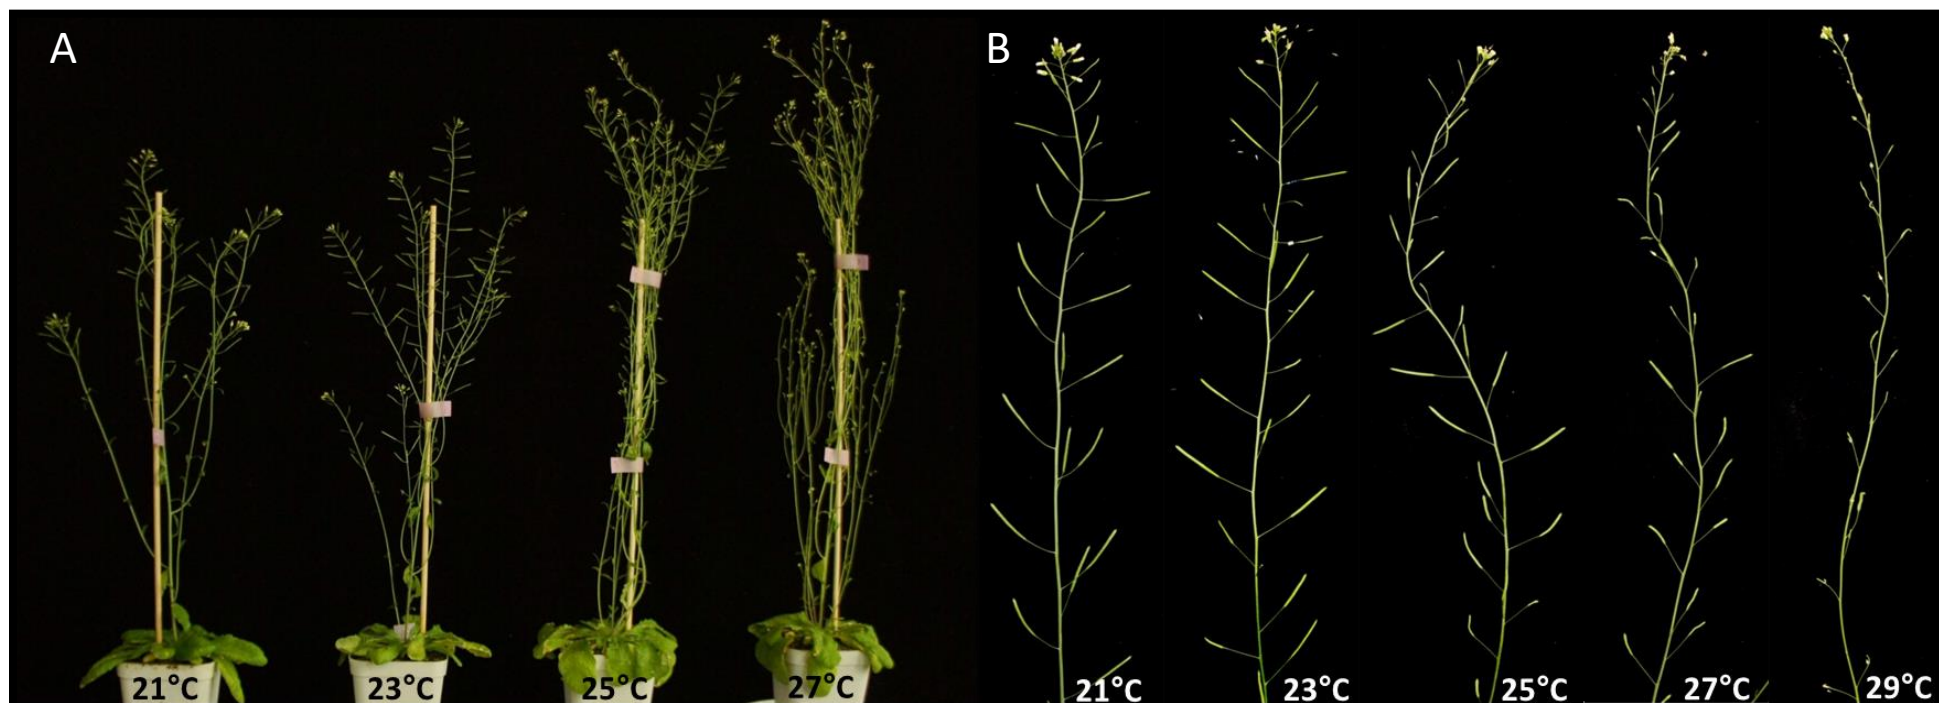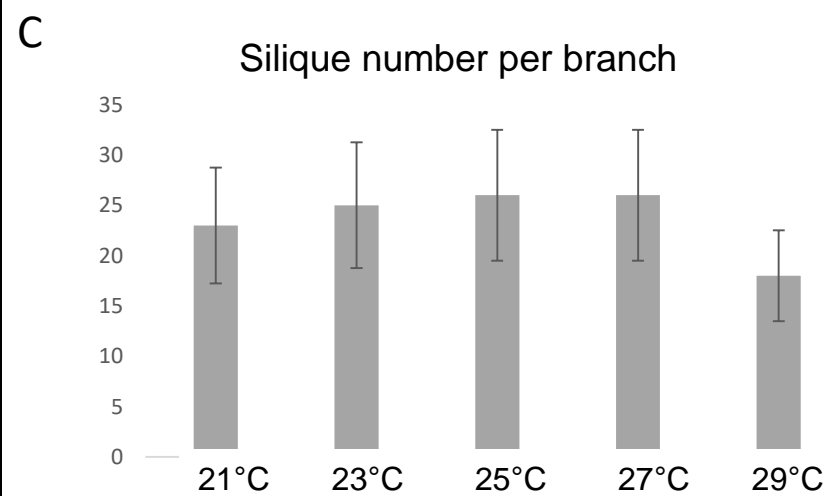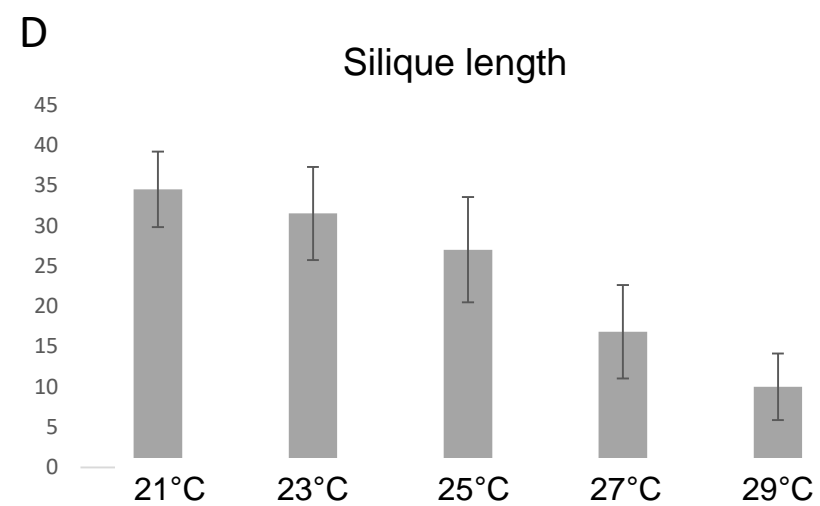

Supplement: s1 [file s1]
